# Supplementary material
Source: HighWire-hosted journal article supplement (https://www.cmajopen.ca/highwire/filestream/84935/field_highwire_adjunct_files/4/CMAJOpen-2020-0136-2-at.pdf)
Supplement: CMAJOpen-2020-0136-2-at.pdf [file CMAJOpen-2020-0136-2-at.pdf]

1 **Interview Guide**

2  
3  
4 **Physician or NP Interview:**

- 5
- 6 • What is your experience with assessing and providing MAiD? (numbers)
  - 7 • How long have you been doing this?
  - 8 • How many patients have you assessed?
  - 9 • How many did you deem ineligible due to capacity? How many did you refer for  
10 forma; capacity assessments?
  - 11 • Now I would like to ask you about how you assess for capacity. Has this changed  
12 over the time you have been doing assessments?
  - 13 • Can you describe to me a situation where you found it especially difficult to assess a  
14 patient’s capacity to choose MAiD?
  - 15 • Do you find that assessing capacity for MAiD is different than other situations such  
16 as stopping treatment?
  - 17 • What have you found most helpful in assessing and documenting capacity for MAiD  
18 in —capacity assessment tools, previous experience, CMPA, the CAMAP guideline,  
19 College guidelines, talking with other MAiD providers?
  - 20 • Do you think the current legal eligibility criteria for capacity at both request and  
21 provision times should be changed?
  - 22 • Have you been involved with patients where there was a disagreement between the  
23 physician/NP assessors about capacity?
  - 24 • Have you had any adverse ramifications (ie: legal, licencing, conflicts with the  
25 family, etc) due to the uncertainty of the patient’s capacity?
  - 26 • How did you receive training to become a MAiD provider (ie: self-directed learning  
27 vs exposure during residency)? Were you aware of the specific issues around  
28 assessing capacity for MAiD?
- 29  
30  
31  
32

33 **Demographics**

34 Age, gender, MD or NP, Canadian graduate, practice type (primary care vs specialists, full time  
35 vs part time), rural or urban

36  
37

Version 200520

Appendix 1, as supplied by the authors. Appendix to: Wiebe E, Kelly M, McMorrow T, et al. Assessment of capacity to give informed consent for medical assistance in dying: a qualitative study of clinicians’ experience. *CMAJ Open* 2021. doi: 10.9778/cmajo.20200136. Copyright © 2021 The Author(s) or their employer(s). To receive this resource in an accessible format, please contact us at [cmajgroup@cmaj.ca](mailto:cmajgroup@cmaj.ca).
